# Supplementary material
Source: Elsevier journal article supplement (https://authors.library.caltech.edu/50097/7/mmc1.xlsx)
Supplement: mmc1 [file mmc1.xlsx]

## Sheet: Table S1
Supplementary Table S1. Nucleotide compositions of 15 mitochondrial (mt) genomes representing the 12 recognised taxa of Trichinella (T1 – T12).
Taxon		Length (bp)	A (%)	C (%)	G (%)	T (%)	A+T (%)
T. spiralis	Entire sequence	16584	26.6	9.8	23.2	40.4	67
(T1; ISS3)	Protein genes	10768	29.1	17.8	18	35.1	64.2
	Ribosomal genes	1637	41.1	19.4	12.6	27	68.1
T. nativa	Entire sequence	14077	40.45	23.84	9.95	25.76	66.21
(T2; ISS10)	Protein genes	10717	29.51	17.14	17.56	35.78	65.29
	Ribosomal genes	1637	41.11	18.08	12.4	28.41	69.52
T. britovi	Entire sequence	16421	40.58	23.08	9.78	26.56	67.14
(T3; ISS120)	Protein genes	10693	29.14	17.24	17.96	35.66	64.8
	Ribosomal genes	1637	41.3	18.39	12.4	27.92	69.22
T. pseudospiralis	Entire sequence	17667	40.9	22.61	9.88	26.61	67.51
(T4.1; ISS13)	Protein genes	10777	29.47	17.71	17.55	35.27	64.74
	Ribosomal genes	1637	39.77	19.67	13.62	26.94	66.71
T. pseudospiralis	Entire sequence	16450	40.66	22.5	10.1	26.75	67.41
(T4.2; ISS588)	Protein genes	10768	29.46	17.74	17.54	35.26	64.72
	Ribosomal genes	1637	39.77	19.67	13.62	26.94	66.71
T. pseudospiralis	Entire sequence	16379	40.61	22.56	10.11	26.72	67.33
(T4.3; ISS176)	Protein genes	10777	29.47	17.72	17.55	35.26	64.73
	Ribosomal genes	1637	39.77	19.67	13.62	26.94	66.71
T. pseudospiralis	Entire sequence	16371	40.51	22.38	10.16	26.95	67.46
(T4.4; ISS470)	Protein genes	10744	29.21	17.62	17.68	35.49	64.7
	Ribosomal genes	1637	39.58	19	13.87	27.55	67.13
T. murrelli	Entire sequence	16589	40.65	22.88	9.72	26.75	67.4
(T5; ISS417)	Protein genes	10726	29.16	17.49	17.9	35.45	64.61
	Ribosomal genes	1637	41.11	18.02	12.46	28.41	69.52
Trichinella sp.	Entire sequence	14521	40.38	23.7	9.99	25.93	66.31
(T6; ISS34)	Protein genes	10774	29.57	17.22	17.51	35.71	65.28
	Ribosomal genes	1637	40.99	18.45	12.46	28.1	69.09
T. nelsoni	Entire sequence	15270	40.62	24.11	9.8	25.47	66.09
(T7; ISS37)	Protein genes	10753	28.95	17.6	18.21	35.24	64.19
	Ribosomal genes	1637	41.6	19.49	12.28	26.63	68.23
Trichinella sp.	Entire sequence	16421	40.19	23.02	9.87	26.23	66.42
(T8; ISS272)	Protein genes	10729	29.12	17.47	18.04	35.37	64.49
	Ribosomal genes	1637	41.3	18.81	12.4	27.49	68.79
Trichinella sp.	Entire sequence	16308	41.26	24.7	9.58	24.46	65.72
(T9; ISS409)	Protein genes	10747	29.13	17.23	17.94	35.69	64.82
	Ribosomal genes	1637	40.99	18.51	12.58	27.92	68.91
T. papuae	Entire sequence	17326	40.25	22.75	10.44	26.52	66.77
(T10; ISS1980)	Protein genes	10753	29.23	18.48	17.78	34.51	63.74
	Ribosomal genes	1637	39.83	20.59	13.5	26.08	65.91
T. zimbabwensis	Entire sequence	14244	39.57	23.95	11.06	25.42	64.99
(T11; ISS1029)	Protein genes	9658	28.75	17.67	18.14	35.43	64.18
	Ribosomal genes	1637	40.07	20.16	13.32	26.45	66.52
T. patagoniensis	Entire sequence	15179	40.11	24.41	9.72	24.94	65.05
(T12; ISS2496)	Protein genes	10753	29.19	17.41	17.97	35.41	64.6
	Ribosomal genes	1637	41.05	19.55	12.34	27.06	68.11
